# Supplementary material for: Rapamycin Alternatively Modifies Mitochondrial Dynamics in Dendritic Cells to Reduce Kidney Ischemic Reperfusion Injury
Source: MDPI journal article supplement (doi:10.3390/ijms22105386), 2021-05-20
Supplement: s1 [file s1]

# **Rapamycin Alternatively Modifies Mitochondrial Dynamics in Dendritic Cells to Reduce Kidney Ischemic Reperfusion Injury**

Maria Namwanje<sup>1,2,5</sup>, Bijay Bisunke<sup>2</sup>, Thomas V. Rousselle<sup>5</sup>, Gene Lamanilao<sup>5</sup>, Venkatadri S. Sunder<sup>3</sup>, Elizabeth C. Patterson<sup>5</sup>, Canan Kuscu<sup>5</sup>, Cem Kuscu<sup>5</sup>, Daniel Maluf<sup>5</sup>, Manjari Kiran<sup>3</sup>, Valeria Mas<sup>5</sup>, James D. Eason<sup>5</sup> and Amandeep Bajwa<sup>2,4,5,\*</sup>

<sup>1</sup>Department of Pediatrics, University of Tennessee Health Science Center, Memphis, TN,  
United States

<sup>2</sup>Department of Genetics, Genomics, and Informatics; College of Medicine, The University of  
Tennessee Health Science Center, Memphis, TN, USA.

<sup>3</sup>Department of Systems and Computational Biology, School of Life Sciences, University of  
Hyderabad, India

<sup>4</sup>Department of Microbiology, Immunology, and Biochemistry; College of Medicine, The  
University of Tennessee Health Science Center, Memphis, TN, USA.

<sup>5</sup>Transplant Research Institute, James D. Eason Transplant Institute, Department of Surgery,  
College of Medicine, The University of Tennessee Health Science Center, Memphis, TN, USA.

## 1. Supplemental Results

### 1.1 Rapamycin induces less immunogenic DCs

RNA-seq analysis using DC cells treated with Rapamycin versus vehicle showed that Rapa-M-DC had a total of 139 DEGs (False discovery rate (FDR)<0.05 (the estimated probability that the normalized enrichment score represents a false-positive finding); Fold change (FC)  $\geq 2$ ), 84 genes were down-regulated, and 55 genes were up-regulated when compared to Veh-DC (Supplemental Table 1). We first identified all statistically enriched terms (GO/KEGG terms, canonical pathways; hallmark gene sets); accumulative hypergeometric *p*-values and enrichment factors were calculated and used for filtering. The remaining significant terms were then hierarchically clustered into a tree based on Kappa-statistical similarities among their gene memberships. Then 0.3 kappa score was applied as the threshold to cast the tree into term clusters. Enrichment analysis (Supplemental Fig. 1A) showed the main pathways associated with Rapa-M-DC associated with cytokine-mediated signaling, regulation of cytokine production, TNF signaling via NF- $\kappa$ B (including sphk1, birc3, pde4b, dennd5a, traf1, ifit2, cxcl3, ccl5, ccr12, il12b, il6, inhba, ptgs2, il1b, and cxcl10) , and IFN- $\gamma$  production or IFN- $\gamma$  response genes ( (including b2m, parp14, ly6e, mthfd2, cd86, pde4b, mvp, stat2, sppl2a, irf8, ifit2, oas3, xaf1, ifit1, rsad2, ccl5, isg15, il6, oas2, ifi44, casp4, ptgs2, cxcl10 genes), all critical in both innate and adaptive immune response. Additionally, pathway analysis using Reactome ([www.reactome.org](http://www.reactome.org)) showed IL10 signaling as a major changing pathway (FDR of  $5.87 \times 10^{-04}$ ). Then a subset of representative terms from this cluster was selected and converted to a network layout. More specifically, each term is represented by a circle node, where its size is proportional to the number of input genes that fall into that term, and its color represents its cluster identity (i.e., nodes of the same color belong to the same cluster). Terms with a similarity score  $> 0.3$  were linked by an edge (the thickness of the edge represents the similarity score). The network was visualized with Cytoscape (v3.1.2) using a “force-directed” layout and with edge bundled for clarity. One term from each

cluster was selected to have its term description shown as label. As shown in the Supplemental Fig. 1B, the DEGs that were associated within pathways using gene enrichment approaches were significantly linked in networks, with most of them showing a direct effect in immune response.

## **2. Supplemental Materials and Methods**

### *2.1 RNA-seq and Analysis*

400 ng of total RNA was used to generate libraries for RNA sequencing using NEB Next Ultra II- Dimensional RNA-seq library prep kit for Illumina (E7765). Briefly, poly A enrichment was performed using NEBNext Poly(A) enrichment module (E7490). First strand and second strand synthesis were done as recommended in the manual. After end repair and adaptor ligation, libraries were indexed, and PCR amplified. Final libraries were quantified by qubit and Agilent bioanalyzer, combined, and sequenced at Oklahoma Medical Research Foundation Clinical Genomics Center using NextSeq500. RNA-Seq Analysis: Libraries were sequenced with 72 bp paired end reads for 2 conditions with 3 biological replicates each. Sequencing reads were first processed (trimming of 5 nt from 5' end) and quality filtered (removal of reads with phred score < 28 in 80% of the read length) using fastx\_toolkit. Trimmed and filtered reads were aligned to mm38 reference genome using bowtie2 with mapping statistics ranging from 88.9%-93.6% for 6 samples[1]. Counts per gene were obtained with Ht seq-count[2]. DESeq2 was used to identify differentially expressed genes for comparisons between Veh/Veh and Rapa/Veh[3].

### *2.2 BMDC staining and FACS*

WT DCs were isolated and propagated for 8 days in presence of GMCSF, total of 3 treatments. Single or multiple Rapamycin (10 ng/ml) treated DCs were used for flow cytometry and imaging using mitochondrial membrane potential probe, JC-1 (ThermoFisher, Waltham, MA). Eight-day old Veh-DCs, Rapa(M)-DCs and Rapa(S)-DCs were grown on cover slips and allowed to attach over-night before staining with Hoechst (5 µg/ml) and JC-1 (5 µM) for 30 mins at 37°C. Some

cells were treated with Hoechst and JC-1 at same concentrations for flow cytometry analysis. Fluorescence images were taken using Nikon Eclipse Ti2 microscope.

### **Supplemental Figure Legend**

**Supplemental Figure 1.** Bioinformatics analysis suggests propagation of BMDCs in presence of Rapamycin induces anti-inflammatory phenotype. **(A)** Enrichment Analysis indicating main pathways associated with treatment of DCs with Rapamycin-M that include cytokine-mediated signaling, regulation of cytokine production, TNF signaling, and IFN gamma production. **(B)** Network analysis using Cytoscape (v3.1.2) with “force-directed” layout and with edge bundled for clarity. One term from each cluster is selected to have its term description shown as label. The DEGs that were associated with pathways using gene enrichment approaches (as shown in 1A) were significantly linked in networks.

**Supplemental Figure 2.** Bone marrow cells were stained with JC-1 for flow cytometry and immunofluorescence imaging. **(A)** Veh-DC, Rapa-M-DC, and Rapa-S-DC were labeled with JC-1 (5  $\mu$ M) and Hoechst (5  $\mu$ g/ml) for immunofluorescence imaging. Scale bar = 100  $\mu$ m. **(B)** Flow cytometry analysis of the Veh-DC, Rapa-M-DC, and Rapa-S-DC were labeled with JC-1 (5  $\mu$ M) and Hoechst (5  $\mu$ g/ml).

**Supplemental Figure 3.** TUNEL analysis of mice treated with either NC (no cells) or Veh-DC, Rapa-M-DC or Rapa-S-DC or Mito-DC in sham and kidney IRI. Representative images are shown. Scale bar = 200  $\mu$ m.

**Supplemental Figure 4.** Original western blot images of OxPhos cocktail for blots in Figure 6I (top, Veh/Veh, Veh/LPS (6 hrs), and Veh/LPS (24 hrs)).

**Supplemental Figure 5.** Original western blot images of GAPDH for blots in Figure 6I (top, Veh/Veh, Veh/LPS (6 hrs), and Veh/LPS (24 hrs). The GAPDH blots were cut prior hybridization with antibodies.

**Supplemental Figure 6.** Original western blot images of OxPhos cocktail for blots in Figure 6I (top, Mito/Veh, Mito/LPS (6 hrs), and Mito/LPS (24 hrs).

**Supplemental Figure 7.** Original western blot images of GAPDH for blots in Figure 6I (top, Mito/Veh, Mito/LPS (6 hrs), and Mito/LPS (24 hrs). The GAPDH blots were cut prior hybridization with antibodies.

### **Supplemental References**

1. Langmead, B.; Salzberg, S.L. Fast gapped-read alignment with Bowtie 2. *Nat Methods* **2012**, *9*, 357-359, doi:10.1038/nmeth.1923.
2. Anders, S.; Pyl, P.T.; Huber, W. HTSeq--a Python framework to work with high-throughput sequencing data. *Bioinformatics* **2015**, *31*, 166-169, doi:10.1093/bioinformatics/btu638.
3. Love, M.I.; Huber, W.; Anders, S. Moderated estimation of fold change and dispersion for RNA-seq data with DESeq2. *Genome Biol* **2014**, *15*, 550, doi:10.1186/s13059-014-0550-8.

A

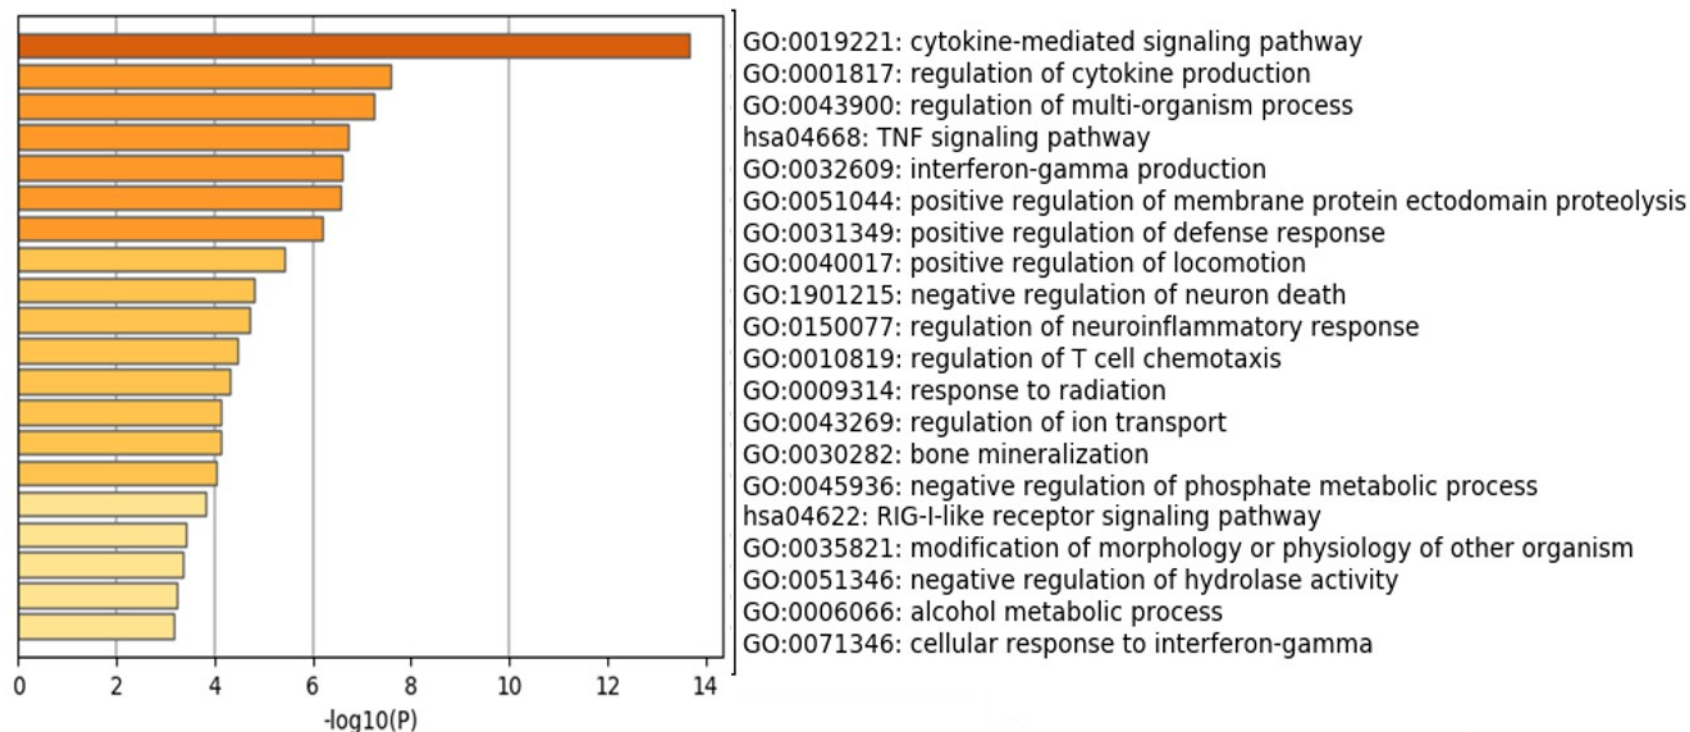

B

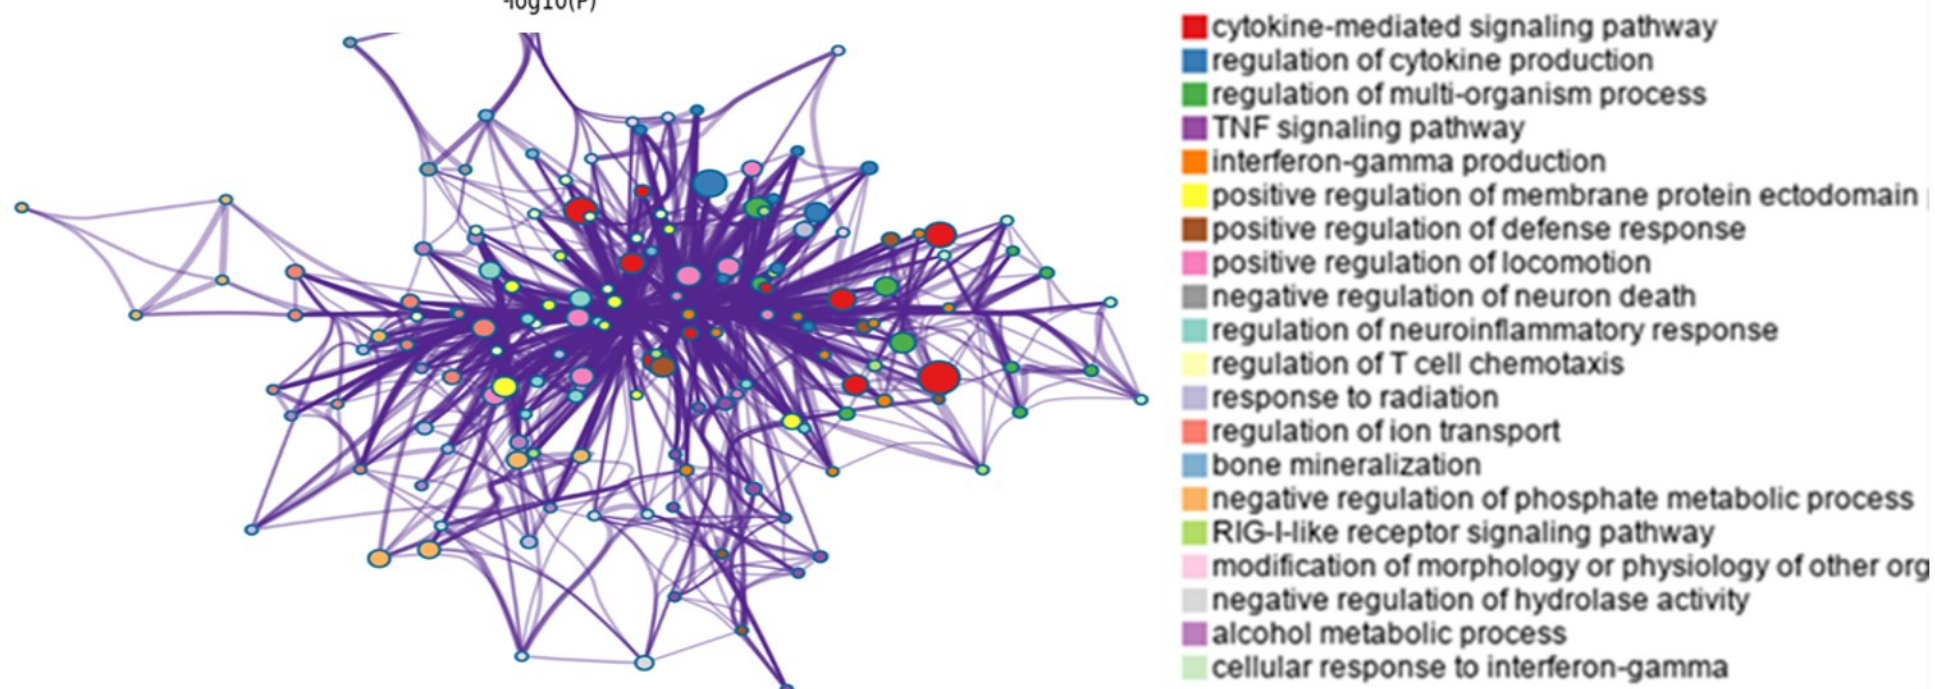

Supplemental Figure 1



**A**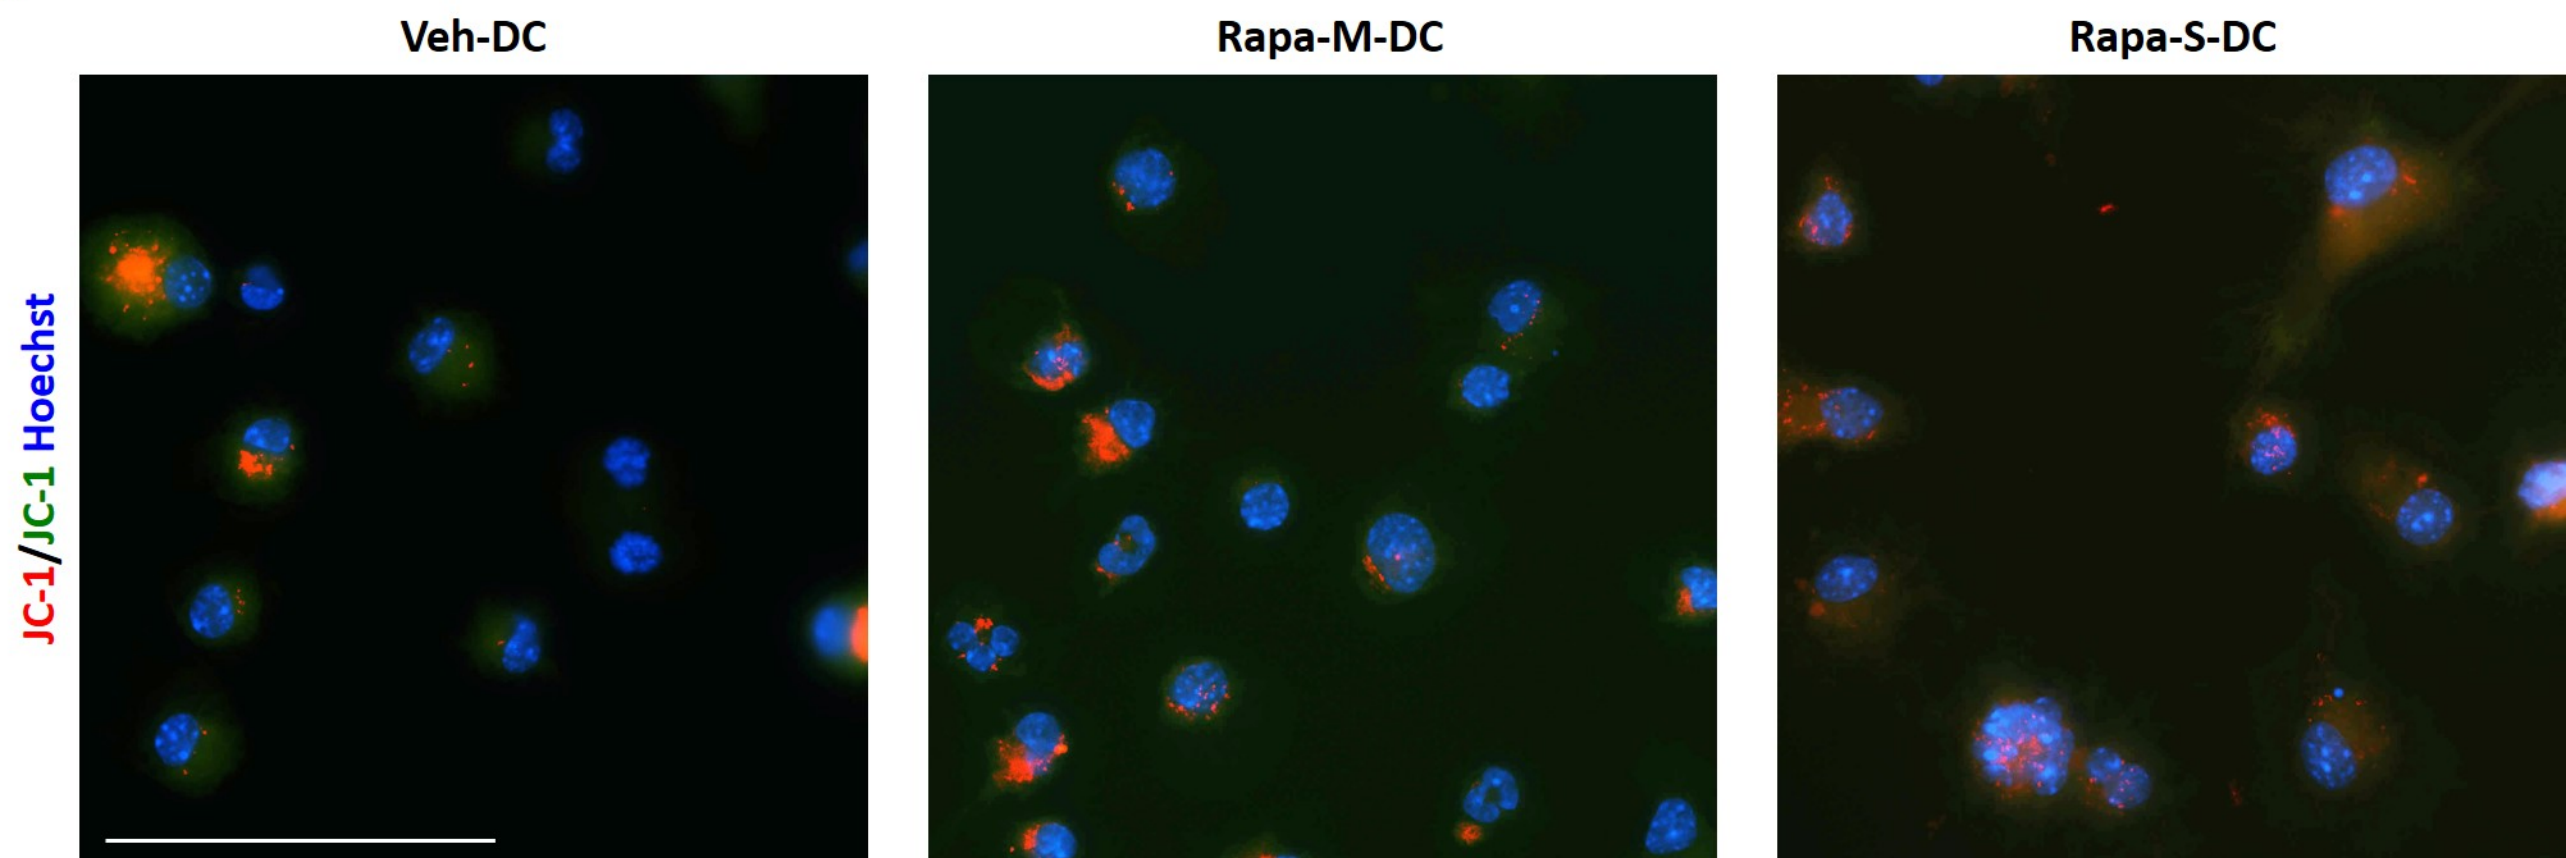**B**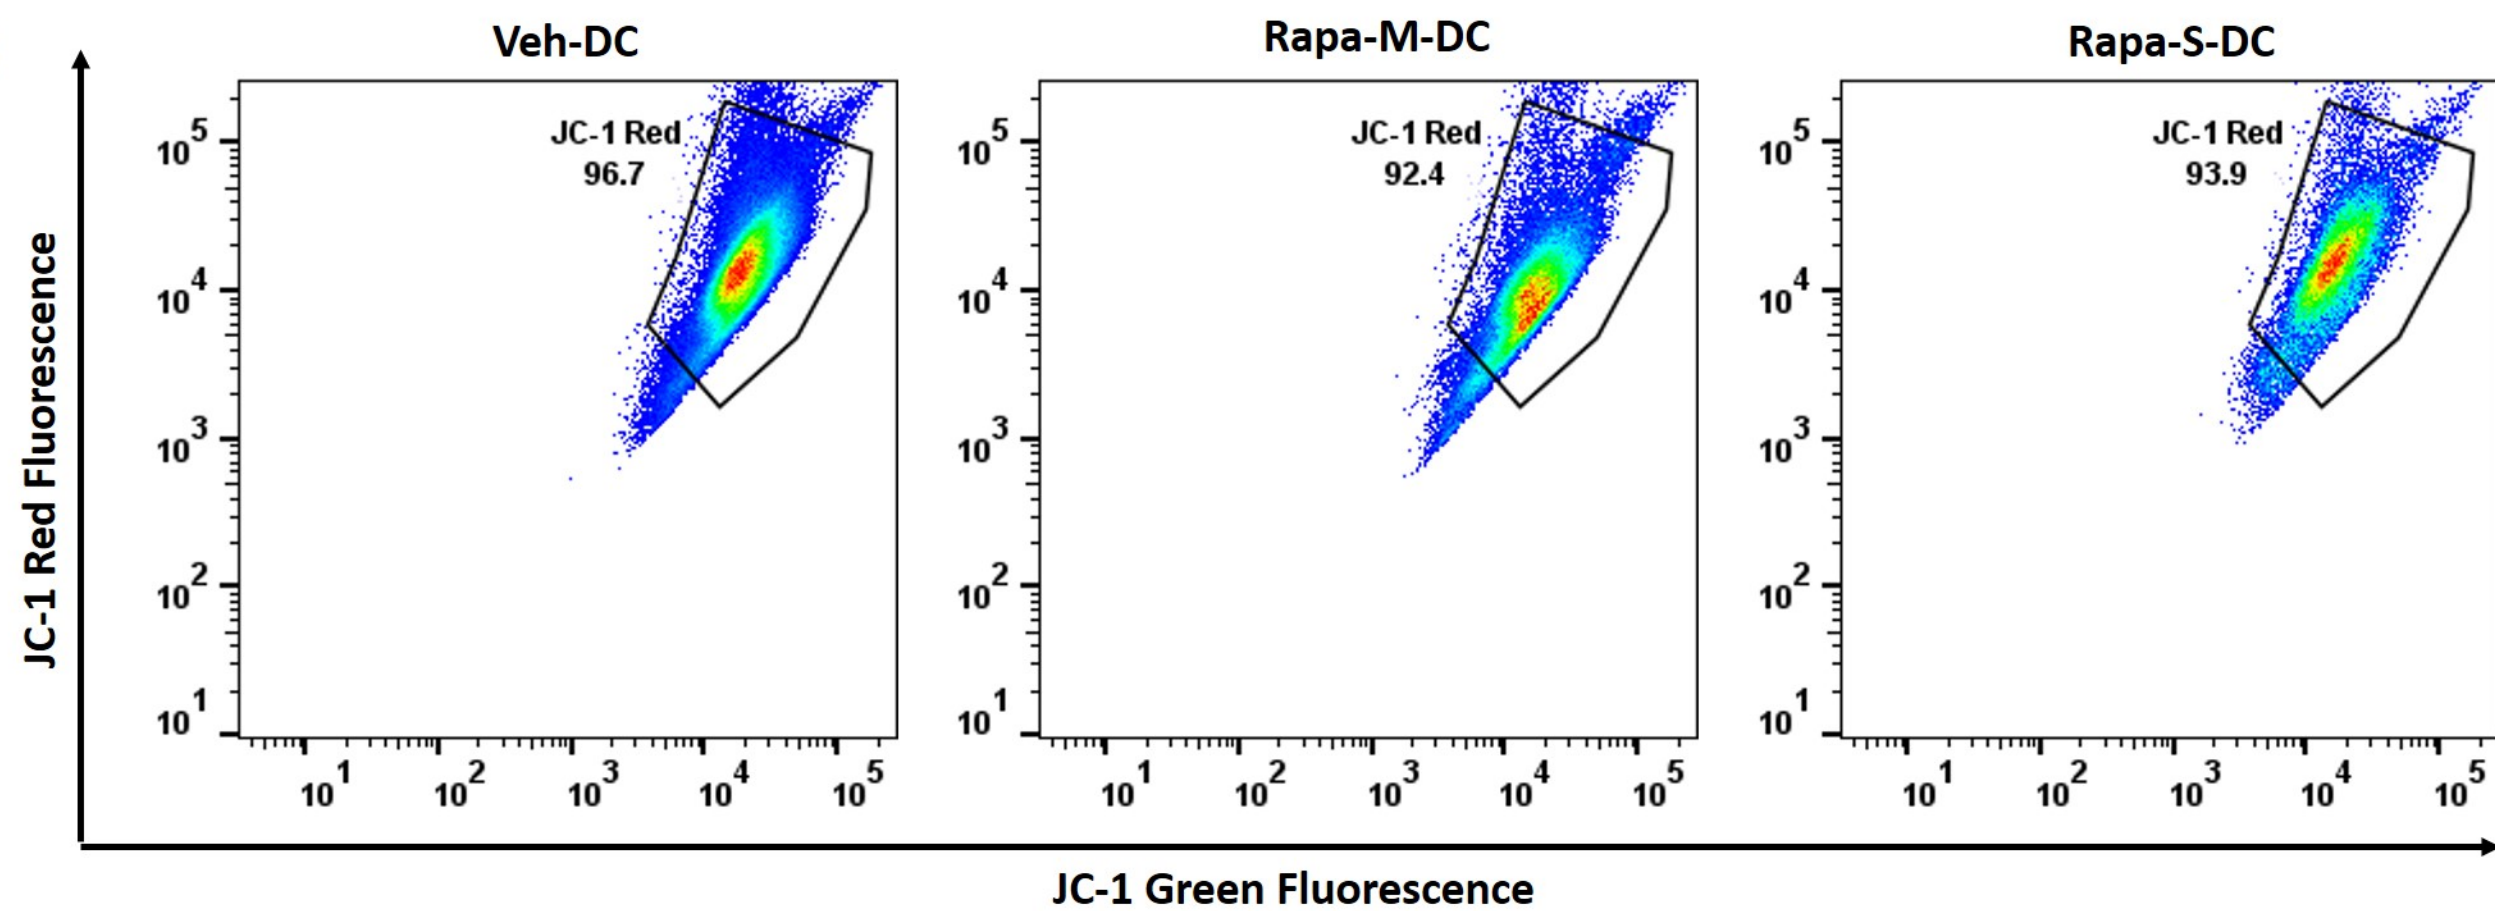**C**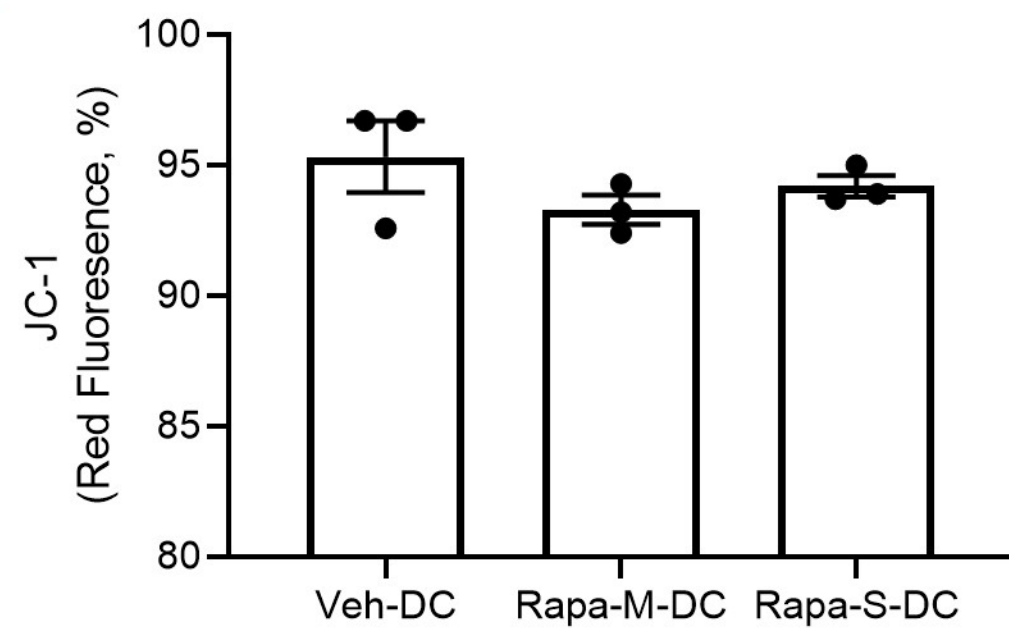



Sham

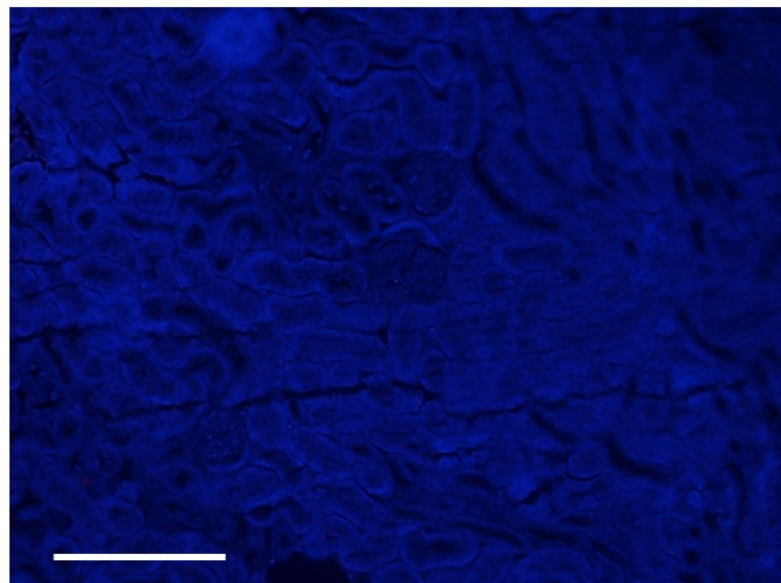

NC

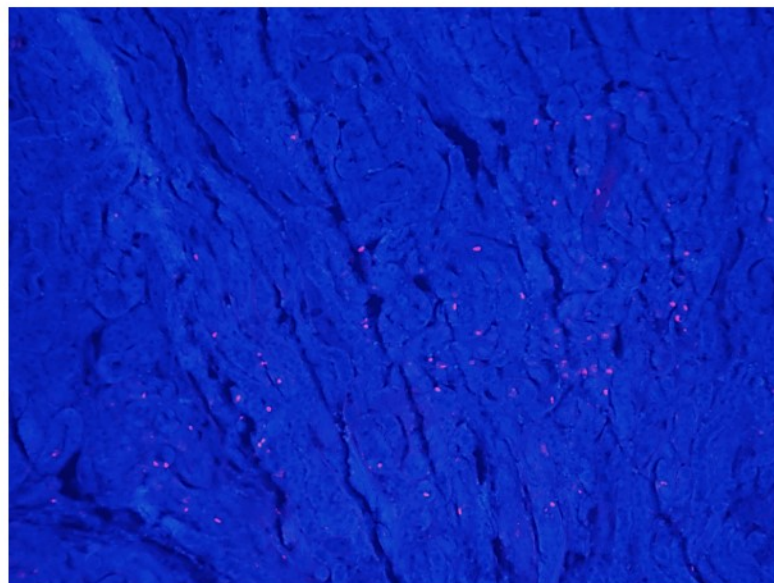

Veh-DC

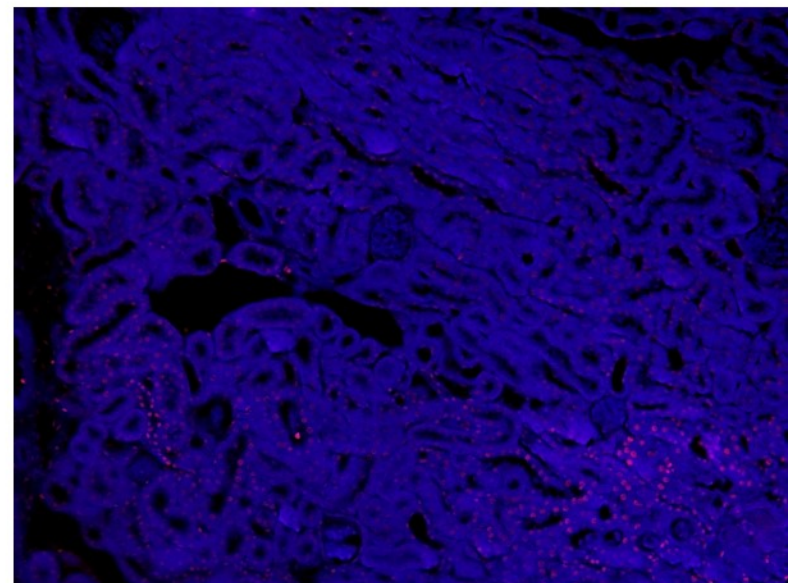

Rapa-M-DC

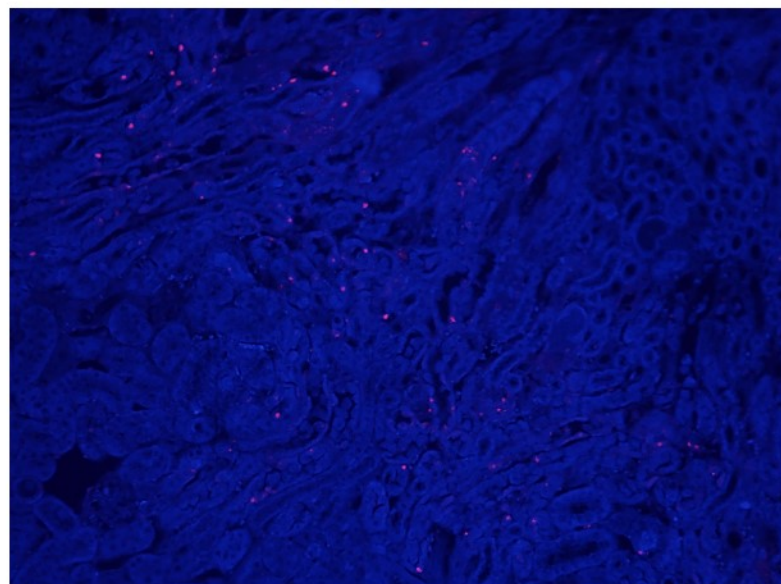

Rapa-S-DC

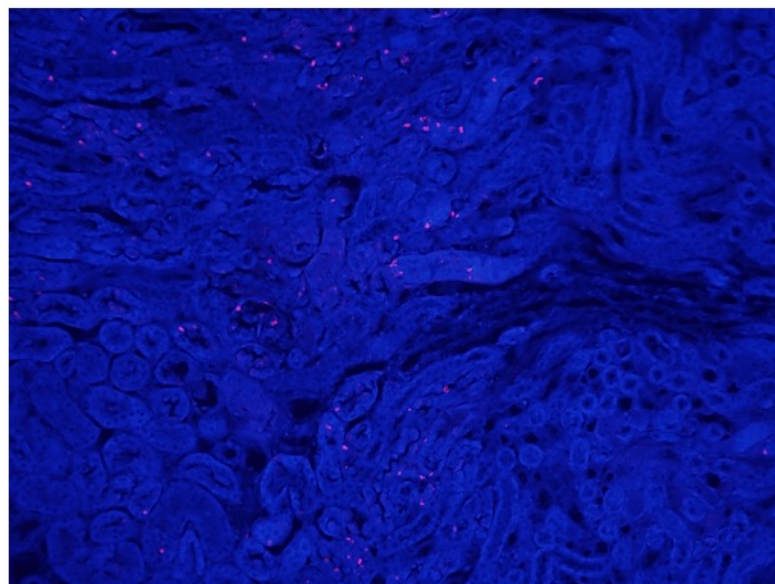

Mito-DC

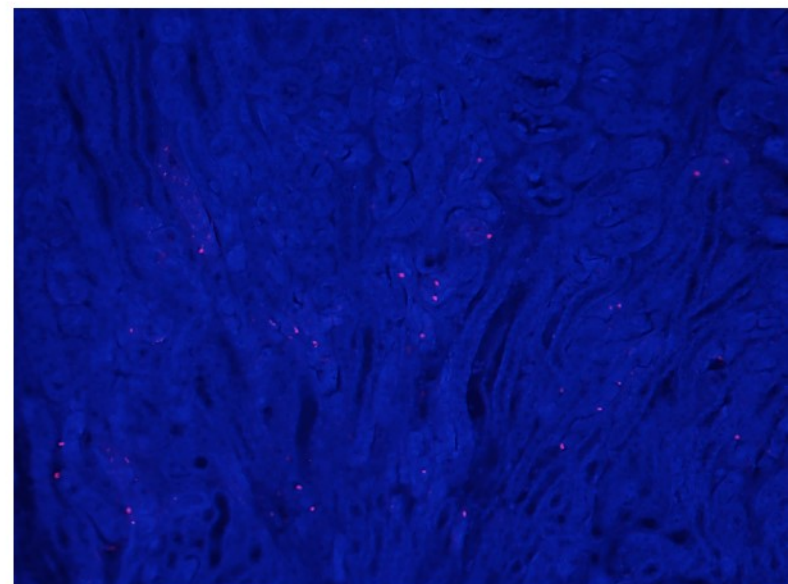



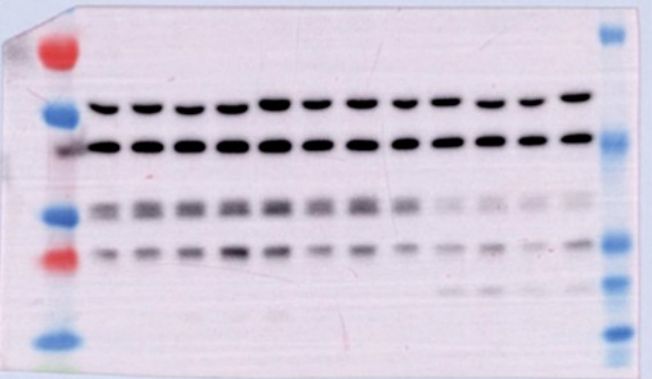

Supplemental Figure 4

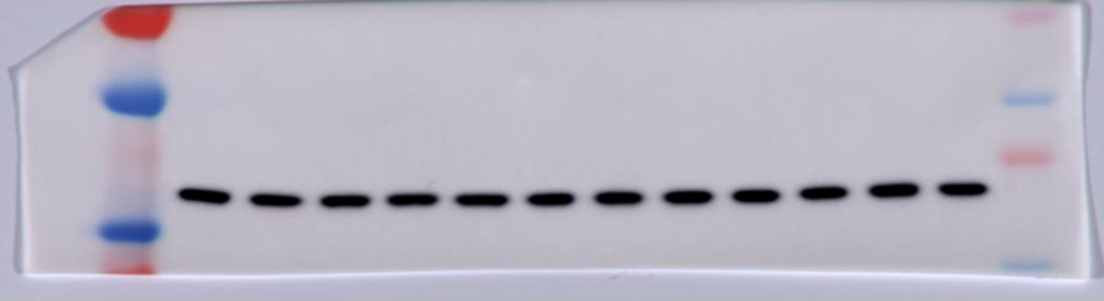

Supplemental Figure 5

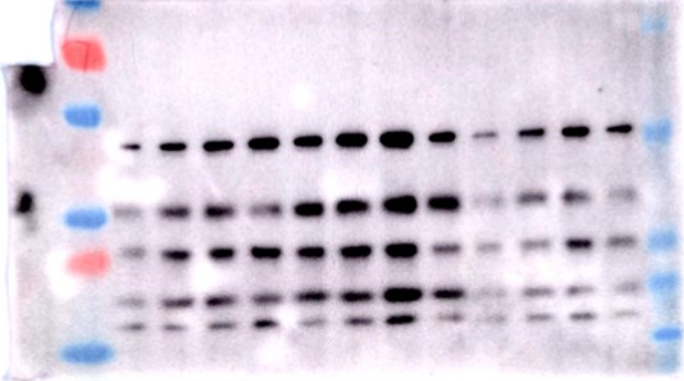

Supplemental Figure 6

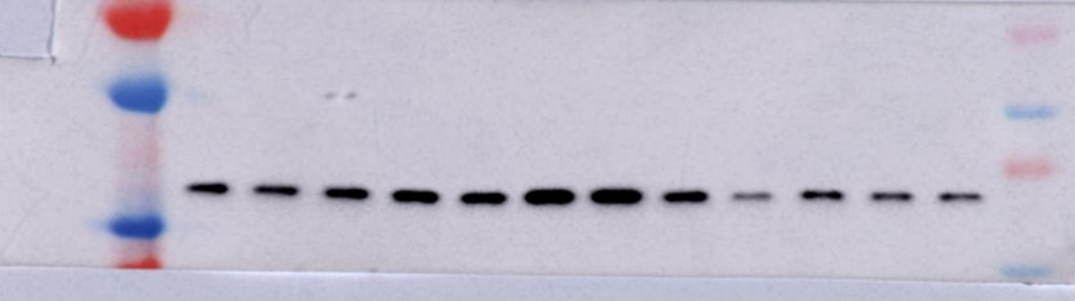

Supplemental Figure 7



**Supplemental Table 1:** Significantly regulated differentially expressed genes in multiple Rapamycin treated DCs (Rapa-M-DC) compared to vehicle treated DCs.

| Ensemble Id         | GeneNames     | baseMean | log2 FoldChange | lfcSE | stat  | p-value | p-adj   |
|---------------------|---------------|----------|-----------------|-------|-------|---------|---------|
| ENSMUSG00000030590  | Fam98c        | 234.62   | 2.96            | 0.44  | 6.66  | 0.00000 | 0.00000 |
| ENSMUSG00000047369  | Dnah14        | 214.62   | 2.38            | 0.41  | 5.76  | 0.00000 | 0.00003 |
| ENSMUSG00000087135  | Gm16096       | 191.30   | -3.36           | 0.64  | -5.29 | 0.00000 | 0.00025 |
| ENSMUSG00000023988  | Bysl          | 914.88   | 1.92            | 0.38  | 5.01  | 0.00000 | 0.00059 |
| ENSMUSG00000031072  | LTO1          | 406.23   | 2.79            | 0.56  | 5.00  | 0.00000 | 0.00059 |
| ENSMUSG00000033717  | Adra2a        | 51.36    | 3.65            | 0.73  | 5.02  | 0.00000 | 0.00059 |
| ENSMUSG00000054006  | D630008O14Rik | 42.44    | 2.66            | 0.54  | 4.94  | 0.00000 | 0.00064 |
| ENSMUSG00000086742  | Gm16201       | 154.18   | 1.65            | 0.34  | 4.93  | 0.00000 | 0.00064 |
| ENSMUSG00000090009  | Gm16282       | 63.51    | 2.26            | 0.47  | 4.85  | 0.00000 | 0.00085 |
| ENSMUSG00000046806  | Cyren         | 687.27   | -2.76           | 0.58  | -4.77 | 0.00000 | 0.00115 |
| ENSMUSG000000114375 | Gm31544       | 57.26    | -3.18           | 0.68  | -4.67 | 0.00000 | 0.00169 |
| ENSMUSG000000103857 | Gm37249       | 43.67    | 2.03            | 0.44  | 4.58  | 0.00000 | 0.00236 |
| ENSMUSG00000090266  | Mettl23       | 1,303.40 | 1.23            | 0.27  | 4.56  | 0.00001 | 0.00240 |
| ENSMUSG00000041515  | Irf8          | 29.12    | -3.38           | 0.74  | -4.54 | 0.00001 | 0.00252 |
| ENSMUSG00000028249  | Sdcbp         | 96.79    | 1.50            | 0.33  | 4.48  | 0.00001 | 0.00293 |
| ENSMUSG00000087633  | Gm14455       | 64.49    | 3.58            | 0.80  | 4.48  | 0.00001 | 0.00293 |
| ENSMUSG000000114871 | Gm21370       | 63.84    | -3.13           | 0.71  | -4.43 | 0.00001 | 0.00339 |
| ENSMUSG00000085457  | 1110046J04Rik | 12.38    | -3.85           | 0.88  | -4.40 | 0.00001 | 0.00375 |
| ENSMUSG00000004296  | Il12b         | 51.71    | -5.65           | 1.31  | -4.32 | 0.00002 | 0.00481 |
| ENSMUSG00000004707  | Ly9           | 98.43    | 2.56            | 0.60  | 4.30  | 0.00002 | 0.00481 |
| ENSMUSG00000029816  | Gpnmb         | 28.56    | -3.29           | 0.77  | -4.30 | 0.00002 | 0.00481 |
| ENSMUSG00000047293  | Gpr15         | 68.55    | 3.52            | 0.82  | 4.31  | 0.00002 | 0.00481 |
| ENSMUSG00000041324  | Inhba         | 58.58    | -5.87           | 1.37  | -4.28 | 0.00002 | 0.00500 |
| ENSMUSG00000047721  | Bola2         | 453.77   | 1.82            | 0.44  | 4.15  | 0.00003 | 0.00834 |
| ENSMUSG00000040963  | Asgr2         | 16.60    | 2.55            | 0.62  | 4.13  | 0.00004 | 0.00881 |
| ENSMUSG00000035042  | Ccl5          | 113.00   | -4.60           | 1.13  | -4.06 | 0.00005 | 0.01054 |
| ENSMUSG000000103175 | Gm37169       | 14.66    | 4.85            | 1.19  | 4.07  | 0.00005 | 0.01054 |
| ENSMUSG000000108219 | Gm44101       | 9.86     | 2.24            | 0.55  | 4.07  | 0.00005 | 0.01054 |
| ENSMUSG00000038415  | Foxq1         | 13.23    | -3.84           | 0.95  | -4.05 | 0.00005 | 0.01061 |
| ENSMUSG00000069516  | Lyz2          | 128.78   | -2.73           | 0.67  | -4.05 | 0.00005 | 0.01061 |
| ENSMUSG00000046338  | Gpat2         | 9.81     | 2.74            | 0.68  | 4.04  | 0.00005 | 0.01070 |
| ENSMUSG000000101144 | Gm29054       | 18.89    | -3.64           | 0.91  | -4.00 | 0.00006 | 0.01229 |
| ENSMUSG00000026358  | Rgs1          | 40.37    | -4.98           | 1.25  | -3.98 | 0.00007 | 0.01262 |
| ENSMUSG00000040026  | Saa3          | 33.90    | -6.72           | 1.69  | -3.97 | 0.00007 | 0.01311 |
| ENSMUSG00000059659  | Gm10069       | 50.40    | 1.63            | 0.41  | 3.96  | 0.00008 | 0.01340 |
| ENSMUSG00000098645  | Gm27201       | 9.86     | 2.82            | 0.72  | 3.94  | 0.00008 | 0.01413 |
| ENSMUSG00000037242  | Clic4         | 26.96    | -2.18           | 0.56  | -3.92 | 0.00009 | 0.01461 |
| ENSMUSG00000029561  | Oasl2         | 23.56    | -4.18           | 1.08  | -3.89 | 0.00010 | 0.01636 |
| ENSMUSG00000097272  | Gm26649       | 394.09   | 1.50            | 0.39  | 3.88  | 0.00010 | 0.01649 |

|                    |               |        |       |      |       |         |         |
|--------------------|---------------|--------|-------|------|-------|---------|---------|
| ENSMUSG00000002985 | Apoe          | 10.99  | -4.54 | 1.19 | -3.82 | 0.00013 | 0.01694 |
| ENSMUSG00000019822 | Smpd2         | 474.25 | 1.48  | 0.39 | 3.83  | 0.00013 | 0.01694 |
| ENSMUSG00000021273 | Fdft1         | 210.81 | -2.56 | 0.67 | -3.83 | 0.00013 | 0.01694 |
| ENSMUSG00000021578 | Ccdc127       | 10.94  | -4.96 | 1.29 | -3.85 | 0.00012 | 0.01694 |
| ENSMUSG00000025407 | Gli1          | 71.90  | 1.61  | 0.42 | 3.84  | 0.00012 | 0.01694 |
| ENSMUSG00000029815 | Malsu1        | 11.82  | -4.32 | 1.12 | -3.85 | 0.00012 | 0.01694 |
| ENSMUSG00000031390 | Avpr2         | 247.07 | 1.70  | 0.44 | 3.83  | 0.00013 | 0.01694 |
| ENSMUSG00000038583 | Pln           | 31.08  | 2.06  | 0.54 | 3.82  | 0.00013 | 0.01694 |
| ENSMUSG00000044867 | Gimap1os      | 24.23  | 3.22  | 0.84 | 3.82  | 0.00014 | 0.01694 |
| ENSMUSG00000052861 | Dnah6         | 27.99  | -4.73 | 1.24 | -3.83 | 0.00013 | 0.01694 |
| ENSMUSG00000106933 | Gm43621       | 90.46  | 1.73  | 0.45 | 3.81  | 0.00014 | 0.01721 |
| ENSMUSG00000001175 | Calm1         | 45.23  | -2.50 | 0.66 | -3.78 | 0.00016 | 0.01818 |
| ENSMUSG00000074354 | Arhgap20os    | 31.26  | 2.50  | 0.66 | 3.78  | 0.00015 | 0.01818 |
| ENSMUSG00000085088 | 4931413K12Rik | 49.58  | 1.75  | 0.46 | 3.79  | 0.00015 | 0.01818 |
| ENSMUSG00000052477 | C130026I21Rik | 12.43  | -3.13 | 0.83 | -3.76 | 0.00017 | 0.01902 |
| ENSMUSG00000100763 | Gm28777       | 8.00   | 2.56  | 0.68 | 3.73  | 0.00019 | 0.02110 |
| ENSMUSG00000020053 | Igf1          | 10.70  | -6.12 | 1.65 | -3.71 | 0.00021 | 0.02172 |
| ENSMUSG00000020641 | Rsad2         | 49.57  | -4.18 | 1.13 | -3.71 | 0.00021 | 0.02172 |
| ENSMUSG00000039697 | Ncoa7         | 19.63  | -3.37 | 0.91 | -3.71 | 0.00020 | 0.02172 |
| ENSMUSG00000073489 | Ifi204        | 16.58  | -3.20 | 0.86 | -3.71 | 0.00021 | 0.02172 |
| ENSMUSG00000026969 | Fam166a       | 132.90 | 1.64  | 0.44 | 3.70  | 0.00022 | 0.02226 |
| ENSMUSG00000032487 | Ptgs2         | 25.57  | -6.69 | 1.82 | -3.68 | 0.00023 | 0.02307 |
| ENSMUSG00000023908 | Pkmyt1        | 32.50  | 1.71  | 0.46 | 3.68  | 0.00023 | 0.02327 |
| ENSMUSG00000058470 | Gm8369        | 8.02   | -5.72 | 1.57 | -3.64 | 0.00028 | 0.02557 |
| ENSMUSG00000084137 | Gm9085        | 10.79  | 3.01  | 0.83 | 3.64  | 0.00028 | 0.02557 |
| ENSMUSG00000106082 | 4930404A12Rik | 268.96 | 1.54  | 0.42 | 3.63  | 0.00028 | 0.02557 |
| ENSMUSG00000106478 | Gm36551       | 50.89  | 2.07  | 0.57 | 3.65  | 0.00026 | 0.02557 |
| ENSMUSG00000111429 | Gm32511       | 26.77  | 3.28  | 0.90 | 3.64  | 0.00027 | 0.02557 |
| ENSMUSG00000017493 | Igfbp4        | 10.75  | -5.39 | 1.49 | -3.63 | 0.00029 | 0.02559 |
| ENSMUSG00000109251 | E230032D23Rik | 41.87  | -2.43 | 0.67 | -3.63 | 0.00029 | 0.02559 |
| ENSMUSG00000027398 | Il1b          | 37.30  | -6.75 | 1.87 | -3.61 | 0.00031 | 0.02634 |
| ENSMUSG00000032661 | Oas3          | 15.22  | -3.76 | 1.04 | -3.61 | 0.00031 | 0.02634 |
| ENSMUSG00000040483 | Xaf1          | 18.21  | -3.93 | 1.09 | -3.61 | 0.00031 | 0.02634 |
| ENSMUSG00000062515 | Fabp4         | 7.08   | -4.42 | 1.23 | -3.59 | 0.00032 | 0.02731 |
| ENSMUSG00000001056 | Nhp2          | 47.60  | 1.97  | 0.55 | 3.57  | 0.00035 | 0.02878 |
| ENSMUSG00000018796 | AcsI1         | 15.47  | -4.12 | 1.16 | -3.56 | 0.00037 | 0.02878 |
| ENSMUSG00000040738 | Ints8         | 34.18  | 2.18  | 0.61 | 3.57  | 0.00036 | 0.02878 |
| ENSMUSG00000099569 | Gm18301       | 18.04  | -6.41 | 1.80 | -3.57 | 0.00036 | 0.02878 |
| ENSMUSG00000100280 | Gm28417       | 203.48 | 1.07  | 0.30 | 3.57  | 0.00036 | 0.02878 |
| ENSMUSG00000031537 | Ikbkb         | 25.51  | -3.47 | 0.97 | -3.56 | 0.00037 | 0.02894 |
| ENSMUSG00000023913 | Pla2g7        | 14.57  | -2.53 | 0.72 | -3.54 | 0.00040 | 0.03064 |
| ENSMUSG00000030402 | Ppm1n         | 19.37  | -6.18 | 1.75 | -3.54 | 0.00041 | 0.03079 |
| ENSMUSG00000003746 | Man1a         | 12.61  | -4.39 | 1.25 | -3.51 | 0.00045 | 0.03187 |

|                    |               |        |       |      |       |         |         |
|--------------------|---------------|--------|-------|------|-------|---------|---------|
| ENSMUSG00000020397 | Med7          | 72.72  | -4.72 | 1.34 | -3.52 | 0.00043 | 0.03187 |
| ENSMUSG00000022901 | Cd86          | 37.20  | -2.84 | 0.81 | -3.52 | 0.00044 | 0.03187 |
| ENSMUSG00000069184 | Zfp72         | 8.49   | -4.31 | 1.23 | -3.51 | 0.00045 | 0.03187 |
| ENSMUSG00000074269 | Rec114        | 72.84  | 1.23  | 0.35 | 3.51  | 0.00045 | 0.03187 |
| ENSMUSG00000118361 | AC132320.1    | 15.35  | -4.48 | 1.28 | -3.51 | 0.00045 | 0.03187 |
| ENSMUSG00000084864 | 1700027A07Rik | 148.99 | 1.62  | 0.46 | 3.50  | 0.00046 | 0.03205 |
| ENSMUSG00000085315 | A430018G15Rik | 13.13  | 2.02  | 0.58 | 3.50  | 0.00046 | 0.03205 |
| ENSMUSG00000031393 | Mecp2         | 11.53  | -3.79 | 1.08 | -3.49 | 0.00047 | 0.03238 |
| ENSMUSG00000022747 | St3gal6       | 169.14 | -1.89 | 0.54 | -3.49 | 0.00048 | 0.03260 |
| ENSMUSG00000085192 | Gm12195       | 27.88  | 1.74  | 0.50 | 3.49  | 0.00049 | 0.03260 |
| ENSMUSG00000087698 | Gm13031       | 15.33  | 2.07  | 0.60 | 3.47  | 0.00051 | 0.03377 |
| ENSMUSG00000028037 | Ifi44         | 8.07   | -6.26 | 1.81 | -3.47 | 0.00052 | 0.03410 |
| ENSMUSG00000040033 | Stat2         | 32.98  | -3.25 | 0.94 | -3.45 | 0.00056 | 0.03589 |
| ENSMUSG00000026875 | Traf1         | 31.45  | -3.57 | 1.04 | -3.44 | 0.00058 | 0.03725 |
| ENSMUSG00000026201 | Stk16         | 48.66  | 1.83  | 0.53 | 3.44  | 0.00059 | 0.03731 |
| ENSMUSG00000020527 | Myo19         | 34.08  | 1.25  | 0.36 | 3.43  | 0.00061 | 0.03746 |
| ENSMUSG00000045962 | Wnk1          | 29.25  | -2.82 | 0.82 | -3.42 | 0.00062 | 0.03746 |
| ENSMUSG00000060509 | Xcr1          | 25.96  | -1.79 | 0.52 | -3.43 | 0.00061 | 0.03746 |
| ENSMUSG00000086430 | 4930551O13Rik | 25.76  | -3.33 | 0.97 | -3.42 | 0.00062 | 0.03746 |
| ENSMUSG00000107560 | Gm44199       | 41.41  | 1.39  | 0.41 | 3.42  | 0.00062 | 0.03760 |
| ENSMUSG00000027611 | Procr         | 49.66  | -4.95 | 1.45 | -3.42 | 0.00063 | 0.03773 |
| ENSMUSG00000039109 | F13a1         | 7.46   | -5.75 | 1.68 | -3.41 | 0.00064 | 0.03775 |
| ENSMUSG00000026827 | Gpd2          | 14.54  | -3.65 | 1.07 | -3.40 | 0.00068 | 0.03813 |
| ENSMUSG00000034855 | Cxcl10        | 10.10  | -6.88 | 2.02 | -3.41 | 0.00066 | 0.03813 |
| ENSMUSG00000040270 | Bach2         | 22.66  | -5.05 | 1.48 | -3.41 | 0.00066 | 0.03813 |
| ENSMUSG00000042508 | Dmtf1         | 165.98 | 1.39  | 0.41 | 3.40  | 0.00068 | 0.03813 |
| ENSMUSG00000090200 | 1700025N21Rik | 98.87  | 2.15  | 0.63 | 3.40  | 0.00068 | 0.03813 |
| ENSMUSG00000033538 | Casp4         | 8.86   | -6.38 | 1.88 | -3.39 | 0.00070 | 0.03881 |
| ENSMUSG00000035168 | Tanc1         | 8.92   | -5.32 | 1.57 | -3.39 | 0.00071 | 0.03881 |
| ENSMUSG00000086507 | Adap2os       | 42.78  | -1.97 | 0.58 | -3.38 | 0.00071 | 0.03881 |
| ENSMUSG00000107143 | Gm6598        | 28.54  | -1.16 | 0.34 | -3.39 | 0.00070 | 0.03881 |
| ENSMUSG00000022781 | Pak2          | 15.02  | -3.32 | 0.98 | -3.38 | 0.00073 | 0.03941 |
| ENSMUSG00000087067 | Gm11532       | 91.55  | -3.04 | 0.90 | -3.37 | 0.00076 | 0.04081 |
| ENSMUSG00000022023 | Wbp4          | 19.43  | -2.30 | 0.68 | -3.35 | 0.00079 | 0.04096 |
| ENSMUSG00000024805 | Pcgf5         | 22.01  | -2.96 | 0.88 | -3.36 | 0.00078 | 0.04096 |
| ENSMUSG00000085684 | 4930469K13Rik | 19.72  | 1.37  | 0.41 | 3.36  | 0.00079 | 0.04096 |
| ENSMUSG00000090863 | A530084C06Rik | 10.30  | -2.45 | 0.73 | -3.36 | 0.00079 | 0.04096 |
| ENSMUSG00000079293 | Clec7a        | 19.07  | -2.40 | 0.72 | -3.35 | 0.00080 | 0.04115 |
| ENSMUSG00000067851 | Arfgef1       | 11.44  | -3.04 | 0.91 | -3.35 | 0.00081 | 0.04123 |
| ENSMUSG00000079036 | Alkbh1        | 60.89  | -1.99 | 0.60 | -3.34 | 0.00083 | 0.04155 |
| ENSMUSG00000005370 | Msh6          | 17.92  | 1.63  | 0.49 | 3.32  | 0.00091 | 0.04533 |
| ENSMUSG00000037997 | Parp11        | 10.75  | -5.00 | 1.51 | -3.31 | 0.00093 | 0.04618 |
| ENSMUSG00000028599 | Tnfrsf1b      | 28.97  | -2.81 | 0.85 | -3.31 | 0.00095 | 0.04661 |

|                    |          |          |       |      |       |         |         |
|--------------------|----------|----------|-------|------|-------|---------|---------|
| ENSMUSG00000087444 | Gm5475   | 13.21    | -5.86 | 1.78 | -3.30 | 0.00097 | 0.04709 |
| ENSMUSG00000073725 | Lmbrd1   | 9.19     | -6.58 | 2.00 | -3.29 | 0.00099 | 0.04774 |
| ENSMUSG00000030144 | Clec4d   | 9.77     | -3.02 | 0.92 | -3.29 | 0.00101 | 0.04829 |
| ENSMUSG00000037613 | Tnfrsf23 | 11.64    | -2.42 | 0.74 | -3.29 | 0.00101 | 0.04829 |
| ENSMUSG00000002844 | Adprh    | 41.91    | -4.94 | 1.51 | -3.27 | 0.00107 | 0.04871 |
| ENSMUSG00000022587 | Ly6e     | 31.95    | -2.74 | 0.84 | -3.26 | 0.00110 | 0.04871 |
| ENSMUSG00000022876 | Samsn1   | 11.54    | -2.05 | 0.63 | -3.28 | 0.00105 | 0.04871 |
| ENSMUSG00000026525 | Opn3     | 16.65    | 3.57  | 1.09 | 3.28  | 0.00103 | 0.04871 |
| ENSMUSG00000034377 | Tulp4    | 756.93   | 1.18  | 0.36 | 3.28  | 0.00104 | 0.04871 |
| ENSMUSG00000035692 | Isg15    | 17.33    | -4.85 | 1.49 | -3.27 | 0.00108 | 0.04871 |
| ENSMUSG00000040829 | Zmynd15  | 1,742.13 | -2.10 | 0.64 | -3.27 | 0.00108 | 0.04871 |
| ENSMUSG00000049362 | Olfir173 | 35.77    | 1.86  | 0.57 | 3.27  | 0.00109 | 0.04871 |
| ENSMUSG00000060802 | B2m      | 98.81    | -1.95 | 0.60 | -3.27 | 0.00109 | 0.04871 |
| ENSMUSG00000096980 | Gm26526  | 74.32    | -1.21 | 0.37 | -3.26 | 0.00113 | 0.04982 |



**Supplemental Table 2:** Relative changes in genes related to Autophagy, Cytokines, Inflammation in Vehicle and Rapamycin (Rapa-S or Rapa-M) DCs with and without LPS after 24 hrs. The genes after LPS indicated in green were down-regulated and in red were up-regulated compared to respective vehicle treatment.

| Gene           | Veh/Veh                                     | Veh/LPS                                     | Rapa-M/Veh                                  | Rapa-M/LPS                                  | Rapa-S/Veh                                  | Rapa-S/LPS                                  |
|----------------|---------------------------------------------|---------------------------------------------|---------------------------------------------|---------------------------------------------|---------------------------------------------|---------------------------------------------|
| Autophagy      |                                             |                                             |                                             |                                             |                                             |                                             |
| <i>Beclin</i>  | $2.5 \times 10^{-2} \pm 1.0 \times 10^{-3}$ | $7.6 \times 10^{-3} \pm 1.7 \times 10^{-3}$ | $1.5 \times 10^{-2} \pm 4.3 \times 10^{-3}$ | $1.9 \times 10^{-2} \pm 2.2 \times 10^{-3}$ | $2.3 \times 10^{-2} \pm 6.2 \times 10^{-3}$ | $4.4 \times 10^{-3} \pm 1.5 \times 10^{-3}$ |
| <i>Atg9</i>    | $6.4 \times 10^{-3} \pm 5.0 \times 10^{-4}$ | $1.1 \times 10^{-2} \pm 1.1 \times 10^{-3}$ | $1.1 \times 10^{-2} \pm 1.4 \times 10^{-3}$ | $1.0 \times 10^{-2} \pm 6.3 \times 10^{-4}$ | $1.6 \times 10^{-2} \pm 2.7 \times 10^{-3}$ | $1.1 \times 10^{-2} \pm 9.0 \times 10^{-4}$ |
| <i>Atg7</i>    | $7.6 \times 10^{-3} \pm 5.0 \times 10^{-4}$ | $1.1 \times 10^{-2} \pm 1.1 \times 10^{-3}$ | $1.2 \times 10^{-2} \pm 6.0 \times 10^{-4}$ | $1.0 \times 10^{-2} \pm 1.6 \times 10^{-3}$ | $1.6 \times 10^{-2} \pm 7.5 \times 10^{-4}$ | $9.7 \times 10^{-3} \pm 6.2 \times 10^{-4}$ |
| <i>Lc3b</i>    | $1.4 \times 10^{-3} \pm 1.0 \times 10^{-4}$ | $1.2 \times 10^{-3} \pm 1.3 \times 10^{-4}$ | $7.9 \times 10^{-4} \pm 9.6 \times 10^{-5}$ | $1.1 \times 10^{-3} \pm 1.4 \times 10^{-4}$ | $7.8 \times 10^{-4} \pm 2.2 \times 10^{-4}$ | $2.2 \times 10^{-4} \pm 5.0 \times 10^{-5}$ |
| <i>Lamp2</i>   | $7.1 \times 10^{-1} \pm 2.9 \times 10^{-2}$ | $3.5 \times 10^{-1} \pm 6.3 \times 10^{-2}$ | $3.5 \times 10^{-1} \pm 1.1 \times 10^{-1}$ | $7.7 \times 10^{-1} \pm 1.8 \times 10^{-1}$ | $1.2 \times 10^{+0} \pm 4.9 \times 10^{-2}$ | $7.6 \times 10^{-1} \pm 3.2 \times 10^{-2}$ |
| Cytokines      |                                             |                                             |                                             |                                             |                                             |                                             |
| <i>Il1b</i>    | $6.1 \times 10^{-2} \pm 1.9 \times 10^{-2}$ | $3.9 \times 10^0 \pm 5.5 \times 10^{-1}$    | $3.3 \times 10^{-2} \pm 2.8 \times 10^{-3}$ | $1.9 \times 10^{+0} \pm 3.7 \times 10^{-1}$ | $7.4 \times 10^{-2} \pm 2.4 \times 10^{-2}$ | $1.1 \times 10^0 \pm 4.5 \times 10^{-1}$    |
| <i>Il12p40</i> | $8.9 \times 10^{-3} \pm 5.0 \times 10^{-4}$ | $5.6 \times 10^{-1} \pm 1.2 \times 10^{-1}$ | $8.5 \times 10^{-3} \pm 1.8 \times 10^{-3}$ | $1.4 \times 10^{-1} \pm 2.3 \times 10^{-2}$ | $1.6 \times 10^{-2} \pm 1.6 \times 10^{-3}$ | $1.5 \times 10^{-1} \pm 5.6 \times 10^{-2}$ |
| Inflammation   |                                             |                                             |                                             |                                             |                                             |                                             |
| <i>Tlr4</i>    | $4.6 \times 10^{-2} \pm 3.8 \times 10^{-3}$ | $1.4 \times 10^{-2} \pm 1.7 \times 10^{-3}$ | $1.8 \times 10^{-2} \pm 4.7 \times 10^{-3}$ | $3.8 \times 10^{-2} \pm 7.0 \times 10^{-3}$ | $5.0 \times 10^{-2} \pm 1.3 \times 10^{-2}$ | $1.3 \times 10^{-2} \pm 3.4 \times 10^{-3}$ |
| <i>Nos2</i>    | $2.7 \times 10^{-3} \pm 1.0 \times 10^{-4}$ | $4.1 \times 10^{-2} \pm 3.5 \times 10^{-3}$ | $8.7 \times 10^{-3} \pm 2.3 \times 10^{-3}$ | $1.0 \times 10^{-2} \pm 9.5 \times 10^{-4}$ | $8.8 \times 10^{-3} \pm 2.1 \times 10^{-3}$ | $2.1 \times 10^{-2} \pm 1.7 \times 10^{-3}$ |
| <i>Hif1a</i>   | $1.1 \times 10^{-1} \pm 3.2 \times 10^{-2}$ | $1.6 \times 10^{-1} \pm 2.9 \times 10^{-2}$ | $1.3 \times 10^{-1} \pm 8.3 \times 10^{-3}$ | $4.3 \times 10^{-2} \pm 6.2 \times 10^{-3}$ | $1.4 \times 10^{-1} \pm 3.5 \times 10^{-2}$ | $3.1 \times 10^{-2} \pm 6.7 \times 10^{-4}$ |
| Other          |                                             |                                             |                                             |                                             |                                             |                                             |
| <i>Ho1</i>     | $7.2 \times 10^{-2} \pm 5.0 \times 10^{-3}$ | $3.2 \times 10^{-1} \pm 6.0 \times 10^{-2}$ | $2.8 \times 10^{-2} \pm 2.6 \times 10^{-3}$ | $7.3 \times 10^{-2} \pm 1.3 \times 10^{-2}$ | $6.1 \times 10^{-2} \pm 1.0 \times 10^{-2}$ | $6.4 \times 10^{-2} \pm 1.5 \times 10^{-2}$ |

**Supplemental Table 3:** Relative changes in genes related to Autophagy, Cytokines, Inflammation in Vehicle and Mitochondria DCs (Mito-DC) with and without LPS after 24 hrs. The genes after LPS indicated in green were down-regulated and in red were up-regulated compared to respective vehicle treatment.

| Gene           | Veh/Veh                                     | Veh/LPS                                     | Mito/Veh                                    | Mito/LPS                                    |
|----------------|---------------------------------------------|---------------------------------------------|---------------------------------------------|---------------------------------------------|
| Autophagy      |                                             |                                             |                                             |                                             |
| <i>Beclin</i>  | $7.1 \times 10^{-2} \pm 2.6 \times 10^{-2}$ | $4.7 \times 10^{-2} \pm 1.5 \times 10^{-2}$ | $1.8 \times 10^{-2} \pm 8.1 \times 10^{-3}$ | $8.6 \times 10^{-3} \pm 1.9 \times 10^{-3}$ |
| <i>Atg9</i>    | $4.7 \times 10^{-3} \pm 2.1 \times 10^{-3}$ | $1.9 \times 10^{-3} \pm 5.5 \times 10^{-4}$ | $1.4 \times 10^{-4} \pm 8.6 \times 10^{-5}$ | $9.5 \times 10^{-2} \pm 3.1 \times 10^{-5}$ |
| <i>Atg7</i>    | $6.5 \times 10^{-2} \pm 2.9 \times 10^{-2}$ | $2.3 \times 10^{-2} \pm 6.3 \times 10^{-3}$ | $9.0 \times 10^{-3} \pm 3.7 \times 10^{-3}$ | $5.2 \times 10^{-3} \pm 1.5 \times 10^{-3}$ |
| <i>Lc3b</i>    | $1.1 \times 10^{-2} \pm 5.5 \times 10^{-3}$ | $5.6 \times 10^{-3} \pm 1.9 \times 10^{-3}$ | $1.0 \times 10^{-2} \pm 7.3 \times 10^{-3}$ | $3.4 \times 10^{-3} \pm 1.3 \times 10^{-3}$ |
| <i>Lamp2</i>   | $2.0 \times 10^0 \pm 8.0 \times 10^{-1}$    | $1.5 \times 10^0 \pm 4.9 \times 10^{-1}$    | $8.4 \times 10^{-1} \pm 5.4 \times 10^{-1}$ | $2.0 \times 10^{-1} \pm 1.8 \times 10^{-2}$ |
| Cytokines      |                                             |                                             |                                             |                                             |
| <i>Il1b</i>    | $3.9 \times 10^{-2} \pm 1.4 \times 10^{-2}$ | $1.5 \times 10^0 \pm 3.3 \times 10^{-1}$    | $2.3 \times 10^{-1} \pm 3.1 \times 10^{-2}$ | $4.5 \times 10^{-1} \pm 1.6 \times 10^{-1}$ |
| <i>Il12p40</i> | $1.4 \times 10^{-1} \pm 4.7 \times 10^{-3}$ | $6.5 \times 10^{-1} \pm 6.0 \times 10^{-2}$ | $8.4 \times 10^{-1} \pm 8.1 \times 10^{-2}$ | $1.0 \times 10^0 \pm 2.6 \times 10^{-2}$    |
| Inflammation   |                                             |                                             |                                             |                                             |
| <i>Tlr4</i>    | $2.2 \times 10^{-1} \pm 9.4 \times 10^{-2}$ | $7.0 \times 10^{-2} \pm 2.1 \times 10^{-2}$ | $1.9 \times 10^{-2} \pm 1.3 \times 10^{-2}$ | $4.5 \times 10^{-3} \pm 1.7 \times 10^{-3}$ |
| <i>Nos2</i>    | $4.9 \times 10^{-4} \pm 7.2 \times 10^{-5}$ | $3.3 \times 10^{-1} \pm 2.4 \times 10^{-2}$ | $9.3 \times 10^{-2} \pm 1.0 \times 10^{-2}$ | $9.5 \times 10^{-2} \pm 7.2 \times 10^{-3}$ |
| <i>Hif1a</i>   | $2.7 \times 10^{-1} \pm 2.8 \times 10^{-2}$ | $1.8 \times 10^{-1} \pm 1.6 \times 10^{-2}$ | $3.4 \times 10^{-2} \pm 2.6 \times 10^{-3}$ | $2.8 \times 10^{-2} \pm 1.4 \times 10^{-3}$ |
| Other          |                                             |                                             |                                             |                                             |
| <i>Ho1</i>     | $2.6 \times 10^{-1} \pm 3.6 \times 10^{-2}$ | $1.3 \times 10^0 \pm 1.0 \times 10^{-1}$    | $1.6 \times 10^0 \pm 1.9 \times 10^{-1}$    | $7.3 \times 10^{-1} \pm 7.2 \times 10^{-2}$ |
